## TRANSBRANCHIAL AMMONIA GRADIENTS AND ACID–BASE RESPONSES TO HIGH EXTERNAL AMMONIA CONCENTRATION IN RAINBOW TROUT (*ONCORHYNCHUS MYKISS*) ACCLIMATED TO DIFFERENT SALINITIES

BY R. W. WILSON\* AND E. W. TAYLOR

*School of Biological Sciences, University of Birmingham, PO Box 363, Birmingham B15 2TT, UK and ICI Environmental Laboratory, Brixham, Devon TQ5 8BA, UK*

*Accepted 23 January 1992*

### Summary

Transbranchial ammonia gradients and blood acid–base status have been examined in rainbow trout acclimated to fresh water (FW), 33% sea water (33%SW) and sea water (SW) and exposed to  $1.0 \text{ mmol l}^{-1}$  total ammonia ( $T_{\text{Amm}}$ ) at pH 7.9 for 24 h. At all three salinities trout maintained large negative (inwardly directed)  $\text{NH}_3$  and  $\text{NH}_4^+$  gradients throughout the exposure, presumably by active excretion of  $\text{NH}_4^+$  to counteract the passive inward diffusion of ammonia. Analysis of blood non-respiratory acid–base status ( $\Delta H_m^+$ ) revealed an acid load in FW trout and a base load in SW trout following 24 h of exposure. This indicates that active  $\text{NH}_4^+/\text{H}^+$  exchange predominates in FW whereas  $\text{NH}_4^+/\text{Na}^+$  is the principal exchange utilised in SW under these experimental conditions.

The plasma  $T_{\text{Amm}}$  load incurred during ammonia exposure increased with salinity. Compared to FW trout, plasma  $T_{\text{Amm}}$  values were 34 and 73% higher in the 33%SW and SW trout, respectively, after 24 h. This cannot be explained by differences in the prevailing transbranchial  $P_{\text{NH}_3}$  gradient because ambient  $P_{\text{NH}_3}$  was substantially lower at the higher salinities (due to higher  $pK'$  and solubility values). We interpret the difference between FW and SW trout as an increased permeability to  $\text{NH}_4^+$  in fish acclimated to the higher-salinity environments. Transbranchial diffusion of  $\text{NH}_4^+$  is, therefore, probably more important as a route for ammonia excretion in SW than in FW trout, especially considering the favourable transepithelial potentials normally found in SW teleosts. In addition, increased  $\text{NH}_4^+$  permeability implies that the toxicity of ammonia will be greater in seawater than in freshwater teleosts and should not simply be measured as a function of the unionised ammonia concentration when considering seawater-adapted species.

\*Present address: Department of Biology, McMaster University, 1280 Main St West, Hamilton, Ontario, Canada L8S 4K1.

Key words: fish, *Oncorhynchus mykiss*, ammonia, salinity, acid–base balance,  $\text{Na}^+(\text{H}^+)/\text{NH}_4^+$  exchange, gill permeability, toxicity.

### Introduction

Teleost fish excrete the majority of their nitrogenous waste as ammonia (Smith, 1929). By far the largest proportion of this ammonia output occurs at the gills (Smith, 1929; Sayer and Davenport, 1987) and results from clearance of ammonia from the blood (Payan and Matty, 1975; Cameron and Heisler, 1983; Ogata and Murai, 1988) as it crosses the arterio-arterial circuit through the lamellae (Payan *et al.* 1984). Under normal conditions of low ambient [ammonia] the transbranchial ammonia gradients ( $\Delta P_{\text{NH}_3}$  and  $\Delta \text{NH}_4^+$ ) are positive (from blood to water) and ammonia excretion can theoretically be achieved by a variety of mechanisms; transcellular and/or paracellular diffusion of  $\text{NH}_3$ , paracellular diffusion of  $\text{NH}_4^+$ , apical or basolateral  $\text{NH}_4^+/\text{Na}^+$  (or  $\text{H}^+$ ) exchange, and basolateral  $\text{NH}_4^+/\text{Na}^+/2\text{Cl}^-$  cotransport (see recent reviews by Cameron and Heisler, 1985; Evans and Cameron, 1986; Randall and Wright, 1987). Despite numerous attempts to quantify the importance of each of these transport mechanisms, the subject of branchial ammonia transfer across fish gills remains controversial.

Transbranchial ammonia gradients can be experimentally reversed by exposure to elevated external ammonia concentrations. When  $\Delta P_{\text{NH}_3}$  and  $\Delta \text{NH}_4^+$  are reversed both freshwater and marine teleosts are able to maintain the total ammonia concentration ( $T_{\text{Amm}} = \text{NH}_4^+ + \text{NH}_3$ ) in their extracellular fluid below that of the external environment (Cameron and Heisler, 1983; Cameron, 1986; Claiborne and Evans, 1988). These authors attributed this to active exchange of  $\text{NH}_4^+$  for an external counterion ( $\text{Na}^+$  or  $\text{H}^+$ ), which is sufficient to balance the passive inward diffusion of ammonia.

The blood acid–base changes and the ammonia load induced by ammonia exposure will depend upon the relative permeability of the fish to  $\text{NH}_3$  and  $\text{NH}_4^+$  and the mechanism used in the active excretion of  $\text{NH}_4^+$ . In freshwater teleosts, when transbranchial ammonia gradients are reversed, the passive uptake of ammonia occurs predominantly *via* the inward diffusion of  $\text{NH}_3$  (Fromm and Gillette, 1968; Cameron and Heisler, 1983; Cameron, 1986; Claiborne and Evans, 1988; Avella and Bornancin, 1989). This has generally been explained by the high diffusibility of lipid-soluble, gaseous  $\text{NH}_3$  through cell membranes (Jacobs, 1940; Pitts, 1973) in contrast to the relatively low permeability of cell membranes and ‘tight’ epithelia (such as freshwater fish gills; Sardet, 1980; Pisam *et al.* 1987) to the hydrated, charged and poorly lipid-soluble ammonium ion. However, the gills of seawater-adapted teleosts have a higher ionic permeability than those of freshwater teleosts (by a factor of 10 or more; Girard and Payan, 1980; Evans, 1979, 1984), which may include an increased permeability to  $\text{NH}_4^+$  (Goldstein *et al.* 1982; Claiborne and Evans, 1988; Evans *et al.* 1989). In seawater-adapted fish the uptake of ammonia when gradients are reversed may, therefore, be augmented by a significant inward diffusion of  $\text{NH}_4^+$ . To test this hypothesis we have compared the ammonia loading and blood acid–base response during exposure to high external ammonia concentration in rainbow trout acclimated to different salinities ranging from fresh water to full-strength sea water (35 ‰). Thus, for the first time,

the influence of salinity on branchial ammonia transfer has been investigated within a single euryhaline species.

### **Materials and methods**

#### *Animals*

Rainbow trout, *Oncorhynchus mykiss* (Walbaum) (300–800 g), were obtained from Zeals Fish Farm, Wiltshire. Following transportation to the ICI Environmental Laboratory, Brixham, Devon, they were transferred to 600 l grey fibreglass tanks and maintained in continuously flowing, dechlorinated Brixham tapwater ( $[\text{Na}^+] \approx 0.6$ ,  $[\text{Cl}^-] \approx 0.5$ ,  $[\text{Ca}^{2+}] \approx 0.8$  mequiv  $\text{l}^{-1}$ ; pH=7.0–7.8;  $T=10$ – $18^\circ\text{C}$ ). Fish were kept on a maintenance diet (1 % body weight  $\text{day}^{-1}$ ) of commercial trout pellets but were starved for 4 days prior to surgery (to avoid post-prandial changes in metabolic rate and excretion of nitrogenous waste during experiments; Jobling, 1981).

#### *Freshwater trout*

Trout used for freshwater experiments were transferred to 600 l acclimation tanks. Water temperature was adjusted to  $15^\circ\text{C}$  in steps of  $2^\circ\text{C}$  per day and then maintained at that temperature for at least 2 weeks prior to experiments.

#### *33 % seawater-acclimated trout*

A continuous supply of 33 % sea water was obtained by mixing dechlorinated tapwater and Torbay sea water at a ratio of 2:1 in a flow-through system. Freshwater trout were transferred to acclimation tanks and the salinity was raised to 12 ‰ ( $[\text{Na}^+] \approx 170$ ,  $[\text{Cl}^-] \approx 200$  mequiv  $\text{l}^{-1}$ ) over a period of 24 h. The temperature of the acclimation water was adjusted to  $15^\circ\text{C}$  in steps of  $2^\circ\text{C}$  per day, and the fish were allowed a minimum acclimation period of 2 weeks once the desired salinity and temperature had been reached.

#### *Seawater trout*

Fish were transferred to acclimation tanks and the salinity of the incoming water was increased in steps to full-strength Torbay sea water (35 ‰,  $[\text{Na}^+] \approx 460$ ,  $[\text{Cl}^-] \approx 550$  mequiv  $\text{l}^{-1}$ ) over a period of 10 days. During this time, water temperature was adjusted to  $12^\circ\text{C}$  and the trout were then given a minimum of 4 weeks to acclimate to this salinity and temperature before use in experiments (the seawater temperature could not be maintained at  $15^\circ\text{C}$  as in the previous two regimes, and  $12^\circ\text{C}$  proved to be the highest constant temperature attainable). Daily water samples were taken for monitoring of salinity (Kent Industrial Instruments Salinometer; model MC5).

#### *Experimental protocol*

To enable repeated blood sampling, fish were anaesthetised with a  $100 \text{ mg l}^{-1}$

solution of MS222 (Sigma) dissolved in a medium of the appropriate salinity (buffered to approximately pH 7.5 with  $\text{NaHCO}_3$  in fresh water). Once anaesthetised, fish were fitted with a chronic indwelling dorsal aortic catheter (Soivio *et al.* 1972) whilst the gills were irrigated with a lower concentration of oxygenated anaesthetic ( $60 \text{ mg l}^{-1}$  MS222). Following surgery, catheters were filled with sodium-heparinised trout saline (Perry *et al.* 1984; heparin =  $50 \text{ i.u. ml}^{-1}$ ) and fish were transferred to individual, darkened, Perspex respirometer tubes ( $40 \text{ cm} \times 10 \text{ cm}$ ) supplied with aerated water ( $P_{\text{O}_2} \geq 19.3 \text{ kPa}$ ) of the appropriate salinity and allowed to recover for a minimum of 36 h.

The experimental set-up was designed to allow exposure of fish to elevated levels of ammonia in a pH-statted flow-through system. Respirometers received water at a rate of  $500\text{--}1000 \text{ ml min}^{-1}$  during experiments (according to fish size). When required, a stock solution of  $250 \text{ mmol l}^{-1}$  ammonium sulphate was dosed into mixing cells situated immediately upstream from the respirometers using peristaltic pumps (Watson–Marlow) at  $1/500$  of the water flow rate to produce the desired water concentration of  $1.0 \text{ mmol l}^{-1}$  total ammonia. Water pH was nominally maintained at 7.9 throughout all regimes by controlled addition of either  $3 \text{ mol l}^{-1}$  HCl (to sea water) or  $2 \text{ mol l}^{-1}$  NaOH (to fresh water). Water pH was monitored using Corning pH and reference electrodes in conjunction with a Kent Industrial pH meter. The output from the meter controlled the speed of a programmable peristaltic pump (Watson–Marlow, 202U/AA), which dosed the acid or base. In addition to this control system, water pH was monitored in the mixing cells (Corning electrodes and meter) to give more accurate readings for the pH of water entering the respirometers.

Catheterised trout were exposed to  $1.0 \text{ mmol l}^{-1}$  [ $T_{\text{Amm}}$ ] at pH 7.9 for a single 24-h period, in fresh water, 33 % sea water (both at  $15^\circ\text{C}$ ) and full-strength sea water ( $12^\circ\text{C}$ ). Approximately 1 h before exposure to high ammonia concentrations a single 'control' blood sample was taken. To follow the changes in acid–base status, plasma ammonia and ions, blood samples were subsequently taken after 1, 5 and 24 h of exposure to high ammonia.

#### *Analytical techniques*

Arterial blood samples (1.0 ml) were anaerobically drawn into chilled Hamilton gas-tight syringes. A  $400 \mu\text{l}$  subsample was immediately centrifuged for 3 min at  $13\,500 \text{ g}$  (MSE Microcentaur) for later plasma  $T_{\text{Amm}}$  and ion analysis. The remainder of the sample was used for the determination of whole-blood  $P_{\text{aO}_2}$ , haematocrit (Hct), haemoglobin content ([Hb]), and the pH and total  $\text{CO}_2$  ( $T_{\text{CO}_2}$ ) of both whole blood and plasma. The blood used for  $P_{\text{aO}_2}$  measurement (approximately  $250 \mu\text{l}$ ) was then returned to the animal followed by infusion of enough saline to replace the net blood volume removed (approximately  $750 \mu\text{l}$ ). Whole-blood and true plasma pH were measured using a Radiometer G279/G2 glass capillary electrode coupled with a K497 calomel reference electrode. Both electrodes were thermostatted to the experimental temperature ( $15$  or  $12^\circ\text{C}$ ) and used in conjunction with a pH/blood gas monitor (Radiometer PHM73). Total

CO<sub>2</sub> was measured on 50 µl subsamples by the method of Cameron (1971) using a P<sub>CO<sub>2</sub></sub> electrode (Radiometer E5037) connected to the same pH/blood gas monitor as above. For both plasma pH and T<sub>CO<sub>2</sub></sub> measurements, plasma was taken from blood centrifuged anaerobically in microhaematocrit tubes used for Hct determination (see below). Arterial blood oxygen tension (P<sub>aO<sub>2</sub></sub>) and water P<sub>O<sub>2</sub></sub> were measured using oxygen electrodes (Radiometer E5046), both thermostatted to experimental temperature, and oxygen meters (Strathkelvin). For each blood sample Hct was determined in duplicate, using 80 µl sodium-heparinised microhaematocrit tubes centrifuged at 12 000 g in a haematocrit centrifuge (Hawksley) for 2 min.

[Hb] was determined in duplicate on 20 µl samples of blood using the cyanomethaemoglobin method (Sigma kit no. 525). Absorbance of the sample plus reagent solution was measured on a dual-beam spectrophotometer at 540 nm (Kontron Uvikon 860). Plasma [T<sub>Amm</sub>] was measured on 200 µl subsamples using a specific enzymatic assay (GIDH/NADH; Sigma 170-UV at 340 nm) and a dual-beam spectrophotometer (Kontron Uvikon 860). Another 40 µl subsample of plasma was immediately diluted 100 times in deionised water and frozen (-20°C) for later measurement of the plasma cations Na<sup>+</sup>, K<sup>+</sup>, Ca<sup>2+</sup> and Mg<sup>2+</sup> by atomic absorption spectrophotometry (Pye Unicam SP9). Plasma [Cl<sup>-</sup>] was measured by amperometric titration on 50 µl samples of undiluted plasma (Aminco-Cotlove automatic chloride titrator).

The water [T<sub>Amm</sub>] was measured using an ammonia electrode (Philips IS 570-NH<sub>3</sub> connected to an Orion specific ion meter, model 407A) after alkalinisation of 50 ml samples with 1 ml of 10 mol l<sup>-1</sup> NaOH to convert all ammonia to the free base form (NH<sub>3</sub>). High-salinity samples were first treated with 1.5 mol l<sup>-1</sup> EDTA (tetrasodium salt; 1 ml added to each 50 ml sample) to chelate metal ions that would otherwise form hydroxide precipitates on addition of NaOH.

#### Calculation of derived variables

Blood P<sub>CO<sub>2</sub></sub> and plasma bicarbonate values were calculated from measurements of plasma T<sub>CO<sub>2</sub></sub> and whole-blood pH using a rearrangement of the Henderson-Hasselbalch equation and values for CO<sub>2</sub> solubility and pK' derived from Boutilier *et al.* (1984).

The P<sub>NH<sub>3</sub></sub> and NH<sub>4</sub><sup>+</sup> in plasma and fresh water were similarly calculated from their respective pH and T<sub>Amm</sub> values using the rearranged Henderson-Hasselbalch equation and values of pK' and solubility determined by Cameron and Heisler (1983). For the 33 % sea water and full sea water media, values for pK' were calculated from their NaCl concentrations and experimental temperatures (15 and 12°C, respectively) using the nomogram of Cameron and Heisler (1983) (9.605 for 33 % sea water and 9.776 for 100 % sea water), which both agree well with the values obtained from the data of Whitfield (1974) for salinities of 12 ‰ (at 15°C) and 35 ‰ (at 12°C).

It is important to note that the pK' and solubility values of ammonia both increase as salinity increases and temperature decreases (Thurston *et al.* 1979). As

a result, the fraction of ammonia present as  $\text{NH}_3$  was progressively lower at the higher salinities, despite constant water pH and  $T_{\text{Amm}}$  (see Table 1).

The transbranchial  $P_{\text{NH}_3}$  and  $[\text{NH}_4^+]$  gradients ( $\Delta P_{\text{NH}_3}$  and  $\Delta[\text{NH}_4^+]$ ) were calculated by simple subtraction:

$$\text{e.g. } \Delta P_{\text{NH}_3} = P_{\text{NH}_3} \text{ in plasma} - P_{\text{NH}_3} \text{ in water,}$$

where the plasma is from the dorsal aorta and, therefore, postbranchial in origin. Ideally, the mean plasma concentration in blood passing through the gill,  $([\text{arterial}] + [\text{venous}])/2$ , should be used to determine the transbranchial gradients. Under normal conditions this can be predicted from the arterial plasma concentration alone, assuming a constant ratio for the  $[T_{\text{Amm}}]$  in pre- and postbranchial blood (from 1.66 to 1.81; Cameron and Heisler, 1983; Wright and Wood, 1985; Ogata and Murai, 1988). However, this ratio does not remain constant under conditions where the ambient  $[T_{\text{Amm}}]$  is raised (see Cameron and Heisler, 1983) and, hence, the mean plasma concentration cannot be estimated unless simultaneous dorsal and ventral aortic cannulations are made. In the present study, transbranchial gradients were simply calculated from dorsal aortic blood plasma measurements, which leads to an underestimate of  $\Delta P_{\text{NH}_3}$  and  $\Delta[\text{NH}_4^+]$  during control conditions. However, this will have a much smaller influence on the calculated gradients during ammonia exposure because the arterial-venous  $T_{\text{Amm}}$  difference is much reduced (venous/arterial  $[T_{\text{Amm}}]$  ratio approximately equal to 1.05 according to the data of Cameron and Heisler, 1983).

The concentration of metabolic (or non-respiratory) protons added to or removed from the blood plasma during the interval between any two successive blood samples was calculated according to the formula of McDonald *et al.* (1980) using non-bicarbonate buffer values estimated from the blood  $[\text{Hb}]$  and the regression relationship of Wood *et al.* (1982). The net load of acidic equivalents in blood plasma at any sample time was then calculated by summing the  $\Delta\text{H}_m^+$  values, signs considered, for each period from the control sample onwards.

Values are expressed as mean  $\pm$  one standard error ( $N$ ) throughout the text. Time-dependent changes during each exposure regime were tested against individual pre-exposure control values, using a Student's two-tailed  $t$ -test (paired) at 5% and 1% levels of significance. The mean values for 33% seawater and seawater trout, at each sample time, were also compared with the corresponding mean values from freshwater trout using a Student's unpaired  $t$ -test, again at 5% and 1% levels of significance.

## Results

### *Ammonia gradients and internal ammonia load*

Control values for  $[T_{\text{Amm}}]$  in arterial plasma averaged  $43 \pm 5$  (6) in FW trout,  $85 \pm 20$  (8) in 33% SW trout and  $86 \pm 12$  (5)  $\mu\text{mol l}^{-1}$  in SW trout (Fig. 1). The twofold higher plasma  $[T_{\text{Amm}}]$  from the 33% SW and SW trout ( $P < 0.05$ ) coincided with the higher  $[T_{\text{Amm}}]$  in Brixham sea water ( $10\text{--}30 \mu\text{mol l}^{-1}$ ) compared with less

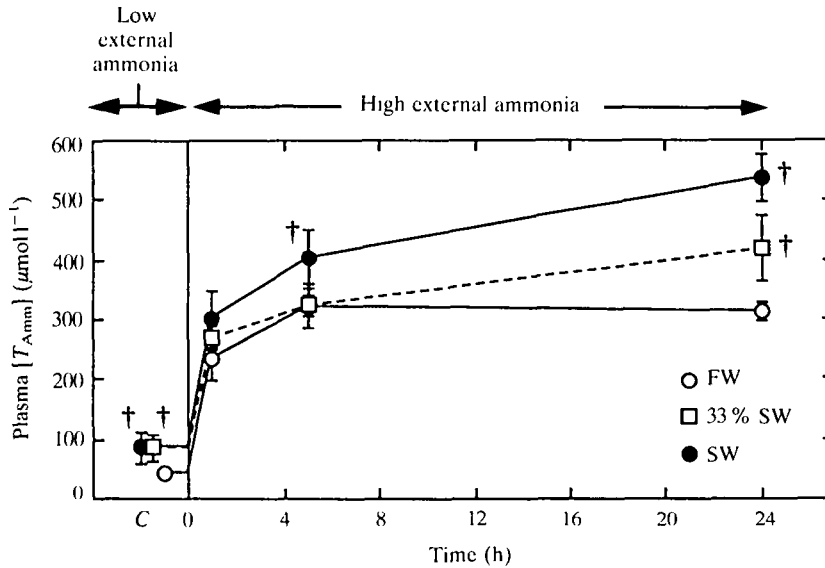

Fig. 1. Plasma total ammonia ( $T_{Amm}$ ) in FW, 33%SW and SW trout prior to and during 24 h of exposure to high external ammonia concentration ( $1000 \mu\text{mol l}^{-1} T_{Amm}$  at pH 7.9). External  $T_{Amm}$  during the control period (C) was less than  $30 \mu\text{mol l}^{-1}$ . † denotes values significantly different when compared with the corresponding value from FW trout ( $P < 0.05$ ; Student's unpaired  $t$ -test). Mean values are shown  $\pm 1$  S.E.M.,  $N=6, 8$  and  $5$  for FW, 33%SW and SW trout, respectively.

than  $10 \mu\text{mol l}^{-1}$  in fresh water). The resultant transbranchial ammonia gradients ( $\Delta\text{NH}_4^+$  and  $\Delta P_{\text{NH}_3}$ ) were always positive (from blood to water) during the control periods with no significant differences between the three groups (Fig. 2).

At the start of each exposure, water [ $T_{Amm}$ ] was raised to a nominal value of  $1000 \mu\text{mol l}^{-1}$  ( $995 \pm 9$  in FW,  $974 \pm 11$  in 33%SW and  $989 \pm 25 \mu\text{mol l}^{-1}$  in SW). This caused an immediate reversal of both  $\Delta P_{\text{NH}_3}$  and  $\Delta\text{NH}_4^+$  to large negative values. However, the magnitude of the initial  $\Delta P_{\text{NH}_3}$  reversal was dependent on the ambient  $P_{\text{NH}_3}$  during high-ammonia treatments (Table 1). Accordingly, the initial reversals were 22 and 40% smaller in 33%SW and SW trout, respectively, when compared with FW trout. In contrast the  $\Delta[\text{NH}_4^+]$  reversals were effectively the same in all three media (Fig. 2).

Reversal of the transbranchial ammonia gradients caused rapid and substantial increases in plasma  $T_{Amm}$  in all three groups within the first hour (Fig. 1). The general pattern of hyperammoniaemia was the same at all three salinities (a rapid initial rise over the first few hours followed by a stabilisation of plasma  $T_{Amm}$ ). Although in all cases plasma  $T_{Amm}$  remained well below the external  $T_{Amm}$ , the magnitude of the resultant plasma ammonia load increased substantially with salinity. After 24 h the plasma  $T_{Amm}$  levels in FW, 33%SW and SW trout were  $311 \pm 15$ ,  $418 \pm 56$  and  $537 \pm 17 \mu\text{mol l}^{-1}$ , respectively. Both the 33%SW and SW

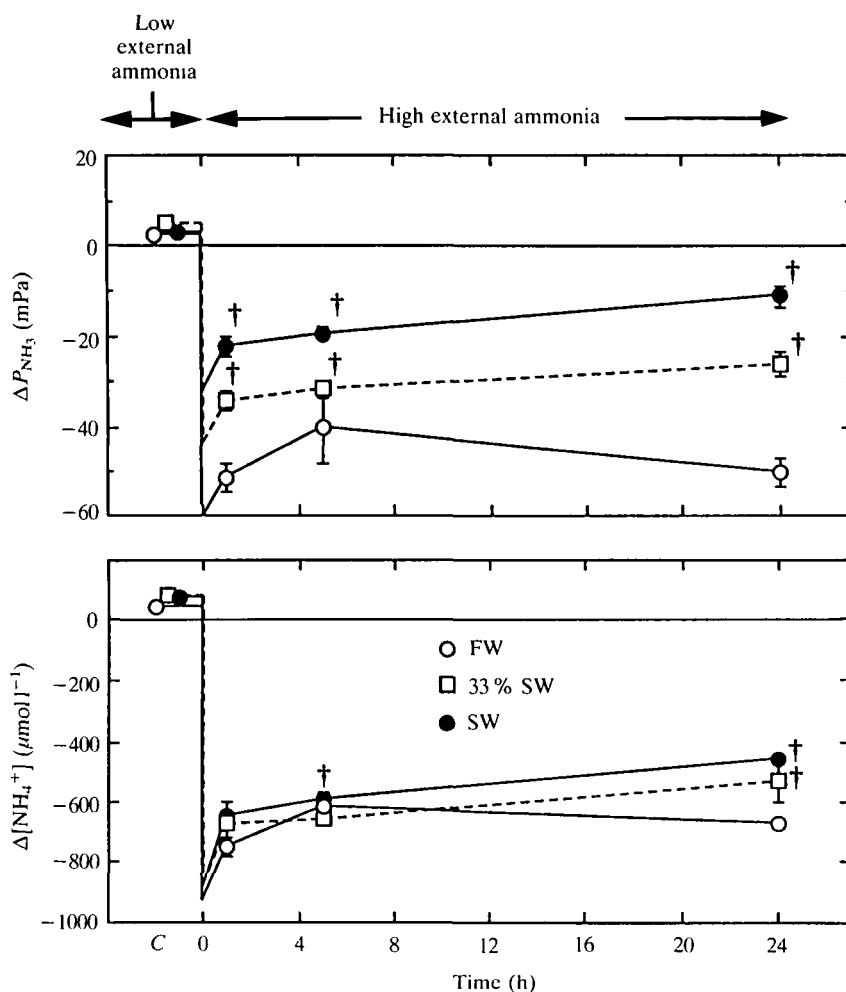

Fig. 2. Transbranchial  $P_{\text{NH}_3}$  and  $[\text{NH}_4^+]$  gradients for FW, 33%SW and SW trout during the control period (C) and during 24 h of exposure to high external ammonia concentration (mean  $\pm$  1 s.e.m.; for  $N$  values see Fig. 1). † denotes values significantly different when compared with the corresponding value from FW trout ( $P < 0.05$ ; Student's unpaired  $t$ -test).

trout had accumulated significantly more ammonia (34% and 73% more) than the FW trout by the end of the exposure ( $P < 0.05$ ).

In all cases  $\Delta P_{\text{NH}_3}$  and  $\Delta[\text{NH}_4^+]$  remained negative throughout the high-ammonia treatment. However, FW trout maintained a more negative  $\Delta P_{\text{NH}_3}$  than SW trout both as an absolute value ( $-50.5$  mPa vs  $-11.2$  mPa at 24 h; Fig. 2) and when compared with their respective  $\Delta P_{\text{NH}_3}$  reversals at time zero ( $\Delta P_{\text{NH}_3}$  values after 24 h were 87% and 34% of the original  $\Delta P_{\text{NH}_3}$  in FW and SW trout, respectively). Although the original (time zero) reversal of  $\Delta[\text{NH}_4^+]$  was virtually



Table 1. The calculated ambient  $P_{\text{NH}_3}$  during high-ammonia experiments at three different salinities

|                                                                    | Fresh water | 33 % sea water | Sea water |
|--------------------------------------------------------------------|-------------|----------------|-----------|
| Temperature (°C)                                                   | 15          | 15             | 12        |
| $\text{pK}'_{\text{Amm}}$ *                                        | 9.505       | 9.605          | 9.762     |
| Water pH                                                           | 7.85        | 7.87           | 7.93      |
| $[T_{\text{Amm}}]$ ( $\mu\text{mol l}^{-1}$ )                      | 995         | 974            | 989       |
| $[\text{NH}_3]$ ( $\mu\text{mol l}^{-1}$ )                         | 21.6        | 17.6           | 14.3      |
| $\alpha_{\text{NH}_3}$ ( $\mu\text{mol l}^{-1} \text{ Pa}^{-1}$ )* | 357.4       | 372.8          | 403.4     |
| $P_{\text{NH}_3}$ (mPa)                                            | 60.4        | 47.2           | 35.4      |

\* From, or interpolated from, the data of Cameron and Heisler (1983).

Values for water pH and  $[T_{\text{Amm}}]$  are the averages of measured values over each 24 h experimental period ( $N=18, 24$  and  $15$  for FW, 33 % SW and SW, respectively).

the same in all media, after 24 h  $\Delta[\text{NH}_4^+]$  was significantly smaller in the 33 % SW and SW trout (Fig. 2).

#### *Acid–base status during high-ammonia treatment*

The pre-exposure pH and  $[\text{HCO}_3^-]$  values of SW trout were lower than those of the FW and 33 % SW groups, but arterial  $P_{\text{CO}_2}$  was essentially the same at all three salinities (Fig. 3). Exposure to ammonia caused no significant blood pH changes in FW trout, and only a slight alkalosis after 1 h in the 33 % SW trout. In contrast, the SW trout experienced a gradual increase in blood pH as the exposure continued which became significant after 24 h (an increase of 0.1 pH units over the control value; Fig. 3). There was a small reduction in arterial  $P_{\text{CO}_2}$  in all groups during the exposure, which occurred more rapidly at the two lower salinities (significant after just 1 h). The trend for a reduction in  $P_{\text{CO}_2}$  continued for 24 h in FW and SW trout. The only significant changes in plasma  $[\text{HCO}_3^-]$  were small decreases observed in the FW trout after 1 and 24 h.

Analysis of the non-respiratory component of the acid–base changes elicited during high-ammonia treatment ( $\Delta\text{H}_m^+$ ) revealed opposite responses in FW and SW trout (Fig. 4). After 24 h, FW trout had accumulated a significant acid load ( $\Delta\text{H}_m^+=1.8\pm 0.4$  mequiv  $\text{l}^{-1}$ ,  $N=6$ ;  $P<0.05$ ) whereas SW trout had developed a significant acid deficit (i.e. a base load;  $\Delta\text{H}_m^+=-2.8\pm 0.7$  mequiv  $\text{l}^{-1}$ ,  $N=5$ ;  $P<0.05$ ). No significant change was observed in the 33 % SW group.

#### *Blood oxygen and plasma ions*

Arterial  $P_{\text{O}_2}$  was unaffected by ammonia exposure apart from a slight increase in the 33 % SW trout after 5 h. There were no significant differences between the three groups, with average  $P_{\text{aO}_2}$  values within the range 12.5–14.2 kPa.

Plasma ion concentrations also remained unchanged during ammonia exposure, regardless of salinity. FW and 33 % SW trout had plasma ion levels typical of

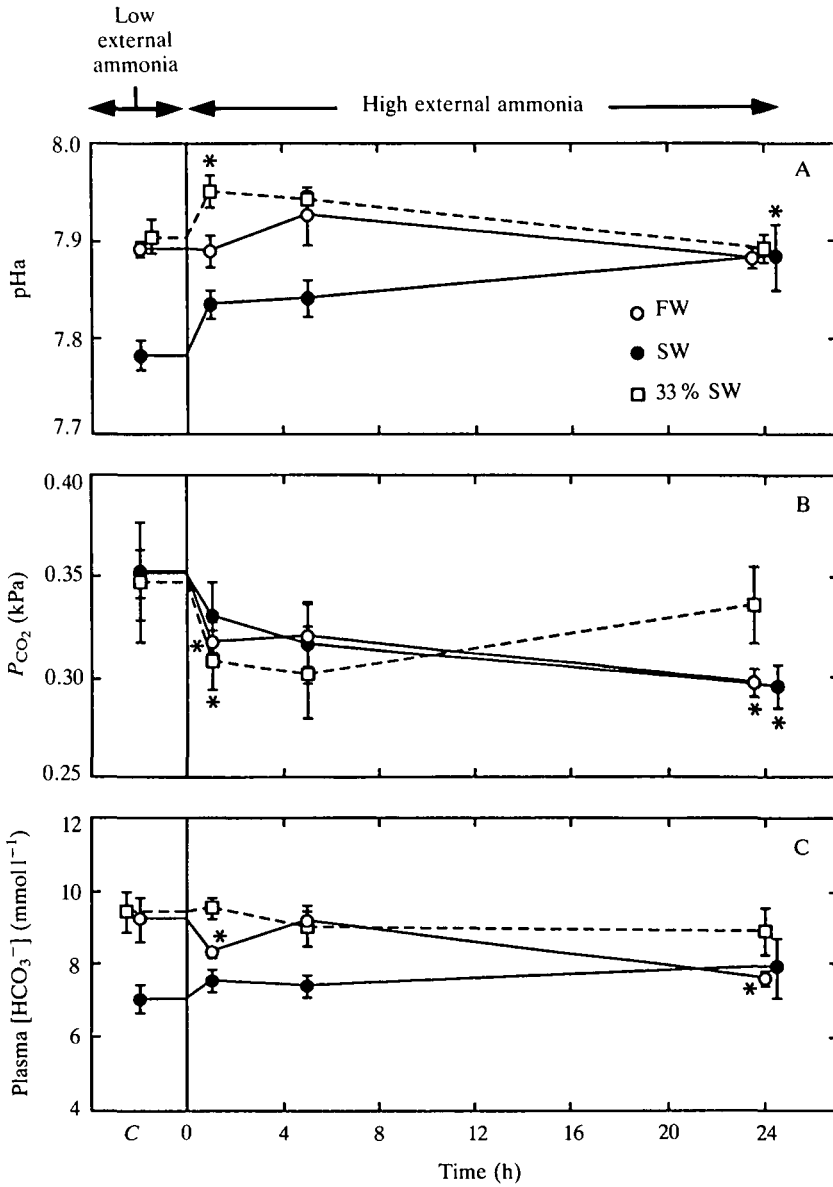

Fig. 3. Blood acid-base variables for FW, 33%SW and SW trout for the control period (C) and during 24h of exposure to high external ammonia concentration; whole-blood pH (A),  $P_{CO_2}$  (B) and plasma  $[HCO_3^-]$  (C), (mean  $\pm$  1 S.E.M.; for *N* values see Fig. 1). \* denotes a value significantly different from the control mean within the group ( $P < 0.05$ ).

previously published values for freshwater trout ( $Na^+ = 148 \pm 3$ ,  $Cl^- = 126 \pm 2$ ,  $K^+ = 2.6 \pm 0.1$ ,  $Ca^{2+} = 4.4 \pm 0.2$ ,  $Mg^{2+} = 1.8 \pm 0.1$  mequiv l<sup>-1</sup>). However, SW trout had significantly higher plasma levels of all the measured ions except magnesium

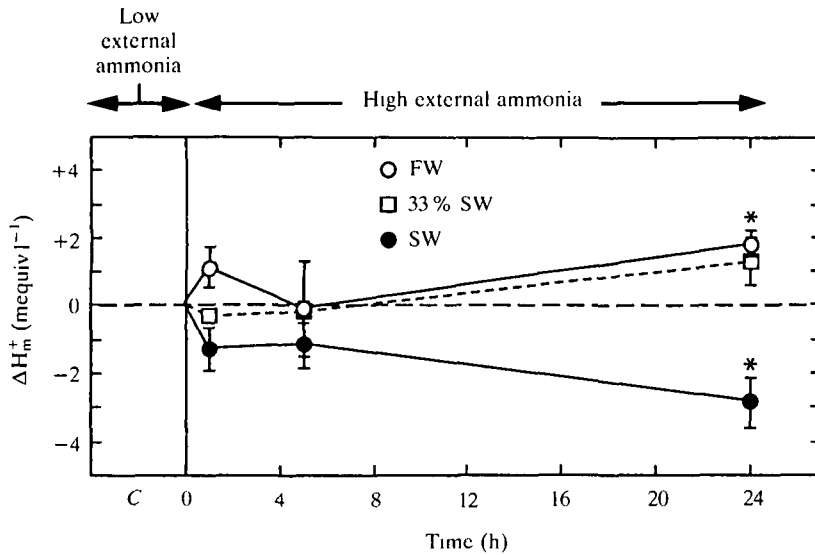

Fig. 4. The non-respiratory acid load for FW, 33%SW and SW trout during the control period (C) and during 24 h of exposure to high external ammonia concentration (mean  $\pm$  1 s.e.m.; for  $N$  values see Fig. 1). \* denotes a value significantly different from the control mean within the group ( $P < 0.05$ ).

( $\text{Na}^+ = 159 \pm 4$ ,  $\text{Cl}^- = 152 \pm 2$ ,  $\text{K}^+ = 3.1 \pm 0.3$ ,  $\text{Ca}^{2+} = 5.8 \pm 0.5$ ,  $\text{Mg}^{2+} = 1.9 \pm 0.2$  mequiv  $\text{l}^{-1}$ ).

### Discussion

The changes in plasma ammonia levels are consistent with those of previous reversed-gradient studies using freshwater rainbow trout (Cameron and Heisler, 1983), freshwater channel catfish *Ictalurus punctatus* (Cameron, 1986) and the marine long-horned sculpin *Myoxocephalus octodecimspinosus* (Claiborne and Evans, 1988). In all cases, plasma  $T_{\text{Amm}}$  increased rapidly, but approached a new steady state within 3–5 h, at a point where both  $\Delta[\text{NH}_4^+]$  and  $\Delta P_{\text{NH}_3}$  were either negative or negligible. Previous reversed-gradient studies have employed exposure times of 6 h or less. It is clear from the present investigation that trout can maintain reversed ammonia gradients for much longer periods (we have continued exposures for up to 48 h) and, indeed, some of the relevant acid–base changes only become apparent after at least 5 h of exposure, subsequent to the stabilisation of plasma  $[T_{\text{Amm}}]$ .

It is unlikely that any change in the form of the total excreted waste nitrogen occurred (e.g. a switch from mainly ammonia to urea excretion), since we have found that during similar ammonia exposure regimes changes in urea excretion play no significant role in the restoration of nitrogenous waste excretion in

rainbow trout (R. W. Wilson and R. S. Munger, unpublished results). If we also assume that no change in the tissue ammonia *production* rate occurred, then the maintenance of negative  $P_{\text{NH}_3}$  and  $[\text{NH}_4^+]$  gradients requires that an active  $\text{NH}_4^+$  extrusion mechanism was operating, which was sufficient to counterbalance the influx of ammonia in addition to excreting the endogenously produced ammonia.

*$\text{NH}_4^+/\text{Na}^+$  or  $\text{NH}_4^+/\text{H}^+$  exchange*

A likely mechanism for the active extrusion of  $\text{NH}_4^+$  is *via* branchial  $\text{Na}^+/\text{NH}_4^+$  exchange. Many authors have provided evidence that supports the existence of a carrier-mediated  $\text{Na}^+/\text{NH}_4^+$  exchange across the fish gill epithelium (Maetz and Garcia-Romeu, 1964; Maetz, 1973; Payan and Matty, 1975; Evans, 1977; Payan, 1978; Wright and Wood, 1985; Balm *et al.* 1988; McDonald and Prior, 1989). When transbranchial ammonia gradients were reversed in the freshwater trout, Cameron and Heisler (1983) suggested that  $\text{Na}^+/\text{NH}_4^+$  exchange could be operating to counterbalance the diffusive uptake of  $\text{NH}_3$ . However, Cameron (1986) more recently found that exchange of internal  $\text{NH}_4^+$  for external  $\text{H}^+$  was the only plausible mechanism that could be fitted to his data from the channel catfish to explain the maintenance of reversed  $\text{NH}_3$  and  $\text{NH}_4^+$  gradients (e.g. the changes in titratable acidity, net apparent  $\text{H}^+$  efflux and lack of change in  $\text{Na}^+$  uptake).

The two suggested mechanisms for active excretion of ammonium ions ( $\text{NH}_4^+/\text{Na}^+$  and  $\text{NH}_4^+/\text{H}^+$  exchange) should have opposite acid–base consequences if operating to counteract the inward diffusion of ammonia. If the majority of ammonia enters the fish as  $\text{NH}_3$ , then an internal alkalosis might be expected, since at the pH of the fish plasma at 12–15°C (approximately 7.9) any inwardly diffusing molecular  $\text{NH}_3$  would associate with protons to form  $\text{NH}_4^+$ . Any ammonia entering the fish as  $\text{NH}_4^+$  would have no acid–base effect. However, transbranchial ammonia movements will only cause changes in blood pH if the respiratory component of blood acid–base status ( $P_{\text{CO}_2}$ ) remains constant. For this reason one must use the non-respiratory component ( $\Delta\text{H}_m^+$ ) of the blood acid–base status when discussing the acid–base consequences of branchial ammonia movements. The schematic diagram in Fig. 5A shows that operation of  $\text{NH}_4^+/\text{Na}^+$  exchange would complete an  $\text{H}^+$  ‘shuttle’, exporting protons ‘trapped’ in  $\text{NH}_4^+$  out of the blood and would therefore be expected to cause an acid deficit or ‘base load’ ( $-\Delta\text{H}_m^+$ ). In contrast, operation of  $\text{NH}_4^+/\text{H}^+$  exchange (Fig. 5B) would counteract the alkalinising effect of passive  $\text{NH}_3$  influx, by taking up  $\text{H}^+$  from the ambient water in exchange for each  $\text{NH}_4^+$  exported. In this respect,  $\text{NH}_4^+/\text{H}^+$  exchange would be both electrically and acid–base neutral. However, if any ammonia were to diffuse into the blood as  $\text{NH}_4^+$  then a small acid load would be expected. In our FW trout, blood pH remained constant but a significant non-respiratory acid load ( $\Delta\text{H}_m^+ = +1.8 \pm 0.4 \text{ mequiv l}^{-1}$ ) had accumulated after 24 h. Although the gills of freshwater fish are considered to be relatively impermeable to  $\text{NH}_4^+$ , the large diffusion gradients during the present experimental regime would probably result in some inward diffusion of  $\text{NH}_4^+$  (McDonald and Prior, 1989). If even a small proportion of the ammonia influx in these

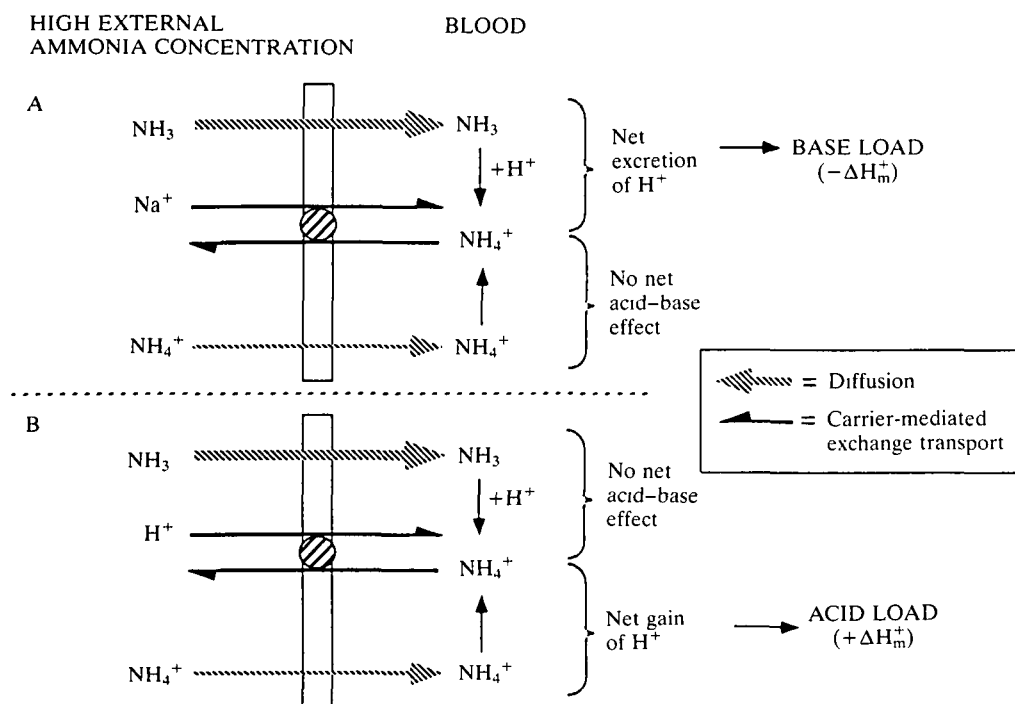

Fig. 5. A schematic representation of the predicted acid-base changes when either branchial  $\text{NH}_4^+/\text{Na}^+$  (A) or  $\text{NH}_4^+/\text{H}^+$  exchange (B) is employed to counteract diffusion of ammonia into the blood during exposure to a high external ammonia concentration. The vertical open bar represents the gill epithelium separating the blood from the external medium.

freshwater fish was the result of  $\text{NH}_4^+$  diffusion, then any subsequent  $\text{NH}_4^+/\text{H}^+$  exchange would cause an acid load resulting from the import of external  $\text{H}^+$  in exchange for the inwardly diffusing  $\text{NH}_4^+$  (see Fig. 5B). It would therefore appear that the  $\text{NH}_4^+/\text{H}^+$  exchange proposed by Cameron (1986) to explain how freshwater channel catfish maintain negative transbranchial ammonia gradients will also explain the acid-base response in FW trout under similar conditions. In contrast, the SW trout developed an acid deficit or 'base load' ( $\Delta\text{H}_m^+ = -2.8 \pm 0.7 \text{ mequiv l}^{-1}$ ). Although the inward diffusion of  $\text{NH}_4^+$  probably does contribute to the plasma hyperammoniaemia in SW trout (see below), any subsequent exchange of  $\text{NH}_4^+$  with external  $\text{Na}^+$  would be acid-base neutral. The acid deficit in the SW trout can be explained by the inward diffusion of  $\text{NH}_3$  followed by extrusion of the subsequently formed  $\text{NH}_4^+$  via  $\text{NH}_4^+/\text{Na}^+$  exchange (see Fig. 5A).

On the basis of the differential acid-base changes observed in FW and SW trout, we suggest that  $\text{NH}_4^+/\text{Na}^+$  exchange predominates in SW-adapted trout but that  $\text{NH}_4^+/\text{H}^+$  is the primary exchange utilised by FW-adapted trout. Given

the very high concentration of  $\text{Na}^+$  in sea water (approximately  $460 \text{ mequiv l}^{-1}$ ), the former seems likely purely from the aspect of counterion availability. In terms of acid–base balance, operation of  $\text{NH}_4^+/\text{H}^+$  exchange under these conditions in fresh water is actually more appropriate than  $\text{NH}_4^+/\text{Na}^+$  exchange if one assumes that the majority of the ammonia influx is *via*  $\text{NH}_3$  diffusion, as removal of  $\text{NH}_4^+$  by this exchange is acid–base neutral and would not involve an increased rate of  $\text{Na}^+$  uptake that might cause a  $\text{Na}^+$  load (plasma  $[\text{Na}^+]$  did not change). In seawater teleosts the unidirectional ion fluxes are an order of magnitude greater than in freshwater fish (Evans, 1984). Increasing the unidirectional  $\text{Na}^+$  uptake (through  $\text{NH}_4^+/\text{Na}^+$  exchange) for the purpose of active  $\text{NH}_4^+$  excretion would probably have little effect on *net* sodium uptake in SW trout. This is presumably why plasma  $[\text{Na}^+]$  also remained unchanged in the SW trout exposed to a high ammonia concentration.

#### *$\text{NH}_4^+$ permeability in freshwater and seawater trout*

The initially rapid increase in plasma  $[T_{\text{Amm}}]$  is likely to be at least partly due to inward diffusion of  $\text{NH}_3$  down its partial pressure gradient since the calculated gill diffusion coefficient for  $\text{NH}_3$  is about the same as that for  $\text{CO}_2$  in rainbow trout (Cameron and Heisler, 1983; Avella and Bornancin, 1989). However, the hyperammoniaemia developed more rapidly and was far more pronounced (73 % higher) in the SW trout where the inward  $P_{\text{NH}_3}$  gradient was 40 % smaller at the start ( $-35.4 \text{ mPa}$  in seawater *vs.*  $-60.4 \text{ mPa}$  in freshwater fish) and 78 % smaller after 24 h ( $-11.2 \text{ mPa}$  in seawater *vs.* a freshwater value of  $-50.5 \text{ mPa}$  at 24 h). Assuming that the gill permeability to gaseous  $\text{NH}_3$  does not change with salinity, and that ammonia production/excretion rates are the same in freshwater and seawater fish (the transbranchial gradients supporting excretion were not significantly different), then there are two possible explanations for this: (i) SW trout may have a greater permeability to  $\text{NH}_4^+$  than their FW-acclimated counterparts, and/or (ii) SW trout have a reduced capacity to excrete  $\text{NH}_4^+$  against a negative gradient. The latter seems extremely unlikely given that SW trout are known to have a fivefold higher capacity than FW trout for the excretion of acidic equivalents ( $\text{H}^+$  and  $\text{NH}_4^+$ ) following exhaustive exercise (Tang *et al.* 1989), which is correlated with the availability of  $\text{Na}^+$  as an external counterion (McDonald *et al.* 1989). In the present study the level of  $\text{Na}^+$  available for active  $\text{NH}_4^+$  excretion is about 660 times greater in sea water. The most plausible explanation for the more rapid and greater accumulation of ammonia in SW trout (which were subjected to a much smaller reversal of  $\Delta P_{\text{NH}_3}$ , but a near identical reversal of  $\Delta[\text{NH}_4^+]$  compared to the FW trout) would appear to be that an increased permeability to  $\text{NH}_4^+$  accompanies the adaptation from fresh water to sea water. This is in keeping with the notion that marine teleosts have higher ionic permeabilities than freshwater fish (Girard and Payan, 1980; Evans, 1979, 1984). Branchial permeability to  $\text{NH}_4^+$  has previously been shown to be important in two marine teleost species, the long-horned sculpin *Myoxocephalus octodecimuspinosus*

and the Gulf toadfish *Opsanus beta* (Goldstein *et al.* 1982; Claiborne and Evans, 1988; Evans *et al.* 1989). Evans *et al.* (1989) reported some preliminary results from experiments using perfused heads of toadfish acclimated to a reduced salinity (5% sea water) that showed the same correlation between salinity and  $\text{NH}_4^+$  permeability. However, this is the first time that a complete comparison has been reported for animals of the same species acclimated to both fresh water and full-strength sea water.

It is of course the *electrochemical* gradient that provides the driving force behind the passive diffusion of ions across the gill. Analysis of branchial  $\text{NH}_4^+$  diffusion should take into account the gill transepithelial potential (TEP). The TEP of most euryhaline fish in sea water is positive (inside relative to outside) and generally in the range of +10 to +35 mV (Potts, 1984), which will promote the outward diffusion of  $\text{NH}_4^+$  under normal conditions (i.e. a low external ammonia concentration). Although  $\text{NH}_4^+$  diffusion is not considered important in freshwater fish, the greater permeability coupled with a positive TEP in seawater teleosts suggests that  $\text{NH}_4^+$  diffusion may have a substantial role in branchial ammonia transfer under normal conditions. Evans *et al.* (1989) determined that passive  $\text{NH}_4^+$  diffusion contributed at least 21% to the overall rate of ammonia excretion in the perfused head of marine *Opsanus beta*. Future research should seek to clarify and quantify the role of this pathway in seawater fish by simultaneous measurements of gill  $\text{NH}_4^+$  and  $\text{NH}_3$  gradients, ammonia fluxes and TEP.

#### *Toxicological implications*

Acute ammonia toxicity occurs when the internal ammonia concentration reaches a critical level causing impairment of cerebral energy metabolism and nerve function (see Smart, 1978; Randall and Wright, 1987). This is obviously dependent on the rate of influx of ammonia during ammonia exposure which, in turn, will be determined by the permeability to  $\text{NH}_3$  and  $\text{NH}_4^+$ . Ammonia toxicity to fish is usually described in terms of the ambient un-ionised ammonia concentration, since this is the variable best correlated with toxicity (Alabaster and Lloyd, 1980; Thurston and Russo, 1983; Thurston *et al.* 1984). This is not surprising considering that the above criterion is based almost exclusively upon data obtained from freshwater fish, which are considered to be relatively impermeable to  $\text{NH}_4^+$ . Since seawater-adapted teleosts appear to have enhanced  $\text{NH}_4^+$  permeability, the use of un-ionised ammonia concentrations to describe toxicity may prove misleading when considering tests on marine species.

This research was conducted under the tenure of a Science and Engineering Research Council CASE studentship (R.W.W.) in cooperation with ICI Environmental Research Laboratories, Brixham, Devon. The authors wish to thank R. S. Thompson and D. Taylor of ICI Environmental Research Laboratories for their invaluable assistance in this project.

## References

- ALABASTER, J. S. AND LLOYD, R. (1980). Ammonia. In *Water Quality Criteria for Freshwater Fish*, pp. 85–102. London, England: Butterworths.
- AVELLA, M. AND BORNANCIN, M. (1989). A new analysis of ammonia and sodium transport through the gills of the freshwater rainbow trout (*Salmo gairdneri*). *J. exp. Biol.* **142**, 155–175.
- BALM, N. G., VAN DE RIJKE, S. AND WENDALAAR BONGA, S. (1988). Characterization of transport  $\text{Na}^+$ -ATPases in the gills of freshwater tilapia. Evidence for  $\text{Na}^+/\text{H}^+(\text{NH}_4^+)$ , ATPase activity in fish gills. *Fish Physiol. Biochem.* **5**, 31–38.
- BOUTILIER, R. G., HEMING, T. A. AND IWAMA, G. K. (1984). Physicochemical parameters for use in fish respiratory physiology. In *Fish Physiology*, vol. XA (ed. W. S. Hoar and D. J. Randall), pp. 403–430. London: Academic Press Inc.
- CAMERON, J. N. (1971). Rapid method for the determination of total carbon dioxide in small blood samples. *J. appl. Physiol.* **31**, 632–634.
- CAMERON, J. N. (1986). Responses to reversed  $\text{NH}_3$  and  $\text{NH}_4^+$  gradients in a teleost (*Ictalurus punctatus*), an elasmobranch (*Raja erinacea*), and a crustacean (*Callinectes sapidus*): Evidence for  $\text{NH}_4^+/\text{H}^+$  exchange in the teleost and the elasmobranch. *J. exp. Zool.* **239**, 183–195.
- CAMERON, J. N. AND HEISLER, N. (1983). Studies of ammonia in the rainbow trout: physicochemical parameters, acid–base behaviour and respiratory clearance. *J. exp. Biol.* **105**, 107–125.
- CAMERON, J. N. AND HEISLER, N. (1985). Ammonia transfer across fish gills: A review. In *Proceedings in Life Sciences, Circulation, Respiration, and Metabolism* (ed. R. Gilles), pp. 91–100. Heidelberg: Springer-Verlag.
- CLAIBORNE, J. B. AND EVANS, D. H. (1988). Ammonia and acid–base balance during high ammonia exposure in a marine teleost (*Myoxocephalus octodecimspinosus*). *J. exp. Biol.* **140**, 89–105.
- EVANS, D. H. (1977). Further evidence for  $\text{Na}^+/\text{NH}_4^+$  exchange in marine teleost fish. *J. exp. Biol.* **70**, 213–220.
- EVANS, D. H. (1979). Fish. In *Comparative Physiology of Osmoregulation in Animals* (ed. G. M. O. Maloiy), pp. 305–390. New York: Academic Press.
- EVANS, D. H. (1984). The roles of gill permeability and transport mechanisms in euryhalinity. In *Fish Physiology*, vol. XB (ed. W. S. Hoar and D. J. Randall), pp. 239–283. New York: Academic Press Inc.
- EVANS, D. H. AND CAMERON, J. N. (1986). Gill ammonia transport. *J. exp. Zool.* **239**, 17–23.
- EVANS, D. H., MORE, K. J. AND ROBBINS, S. L. (1989). Modes of ammonia transport across the gill epithelium of the marine teleost fish *Opsanus beta*. *J. exp. Biol.* **144**, 339–356.
- FROMM, P. O. AND GILLETTE, J. R. (1968). Effect of ambient ammonia on blood ammonia and nitrogen excretion of rainbow trout, *Salmo gairdneri*. *Comp. Biochem. Physiol.* **26**, 887–896.
- GIRARD, J. O. AND PAYAN, P. (1980). Ion exchanges through respiratory and chloride cells in freshwater and seawater adapted teleosts. *Am. J. Physiol.* **238**, R260–R268.
- GOLDSTEIN, L., CLAIBORNE, J. B. AND EVANS, D. H. (1982). Ammonia excretion by the gills of two marine teleost fish: An important role for ionic diffusion. *J. exp. Zool.* **219**, 395–398.
- JACOBS, M. H. (1940). Some aspects of cell permeability to weak electrolytes. *Cold Spring Harbour Sym. quant. Biol.* **8**, 30–39.
- JOBLING, M. (1981). The influence of feeding on the metabolic rate of fishes: a short review. *J. Fish Biol.* **18**, 385–400.
- MAETZ, J. (1973).  $\text{Na}^+/\text{NH}_4^+$ ,  $\text{Na}^+/\text{H}^+$  exchange and  $\text{NH}_3$  movement across the gill of *Carassius auratus*. *J. exp. Biol.* **58**, 255–275.
- MAETZ, J. AND GARCIA-ROMEU, F. (1964). The mechanism of sodium and chloride uptake by the gills of a freshwater fish, *Carassius auratus*. II. Evidence for  $\text{NH}_4^+/\text{Na}^+$  and  $\text{HCO}_3^-/\text{Cl}^-$  exchanges. *J. gen. Physiol.* **47**, 1209–1227.
- MCDONALD, D. G., HÖBE, H. AND WOOD, C. M. (1980). The influence of calcium on the physiological responses of the rainbow trout, *Salmo gairdneri*, to low environmental pH. *J. exp. Biol.* **88**, 109–131.



- MCDONALD, D. G. AND PRIOR, E. T. (1989). Branchial mechanisms of ion and acid-base regulation in the freshwater rainbow trout, *Salmo gairdneri*. *Can. J. Zool.* **66**, 2699–2708.
- MCDONALD, D. G., TANG, Y. AND BOUTILIER, R. G. (1989). The role of  $\beta$ -adrenoreceptors in the recovery from exhaustive exercise of freshwater-adapted rainbow trout. *J. exp. Biol.* **147**, 471–491.
- OGATA, H. AND MURAI, T. (1988). Changes in ammonia and amino acid levels in the erythrocytes and plasma of carp, *Cyprinus carpio*, during passage through the gills. *J. Fish Biol.* **33**, 471–479.
- PAYAN, P. (1978). A study of the  $\text{Na}^+/\text{NH}_4^+$  exchange across the gill of the perfused head of the trout (*Salmo gairdneri*). *J. comp. Physiol.* **124**, 181–188.
- PAYAN, P., GIRARD, J. P. AND MAYER-GOSTAN, N. (1984). Branchial ion movements in teleosts: the roles of respiratory and chloride cells. In *Fish Physiology*, vol. XB (ed. W. S. Hoar and D. J. Randall), pp. 39–63. London: Academic Press Inc.
- PAYAN, P. AND MATTY, A. J. (1975). The characteristics of ammonia excretion by a perfused isolated head of trout (*Salmo gairdneri*): Effect of temperature and  $\text{CO}_2$ -free Ringer. *J. comp. Physiol. B* **96**, 167–184.
- PERRY, S. F., DAVIE, P. S., DAXBOECK, C., ELLIS, A. G. AND SMITH, D. G. (1984). Perfusion methods for the study of gill physiology. In *Fish Physiology*, vol. XB (ed. W. S. Hoar and D. J. Randall), pp. 326–381. London: Academic Press Inc.
- PISAM, M., CAROFF, A. AND RAMBOURG, A. (1987). Two types of chloride cells in the gill epithelium of a freshwater-adapted euryhaline fish: *Lebistes reticulatus*; their modifications during adaptation to saltwater. *Am. J. Anat.* **179**, 40–50.
- PITTS, R. F. (1973). Production and excretion of ammonia in relation to acid-base regulation. In *Handbook of Physiology*, section 8, *Renal Physiology* (ed. J. Orloff and R. W. Berliner), pp. 445–496. Washington: Am. Physiol. Soc.
- POTTS, W. T. W. (1984). Transepithelial potentials in fish gills. In *Fish Physiology*, vol. XB (ed. W. S. Hoar and D. J. Randall), pp. 39–63. London: Academic Press Inc.
- RANDALL, D. J. AND WRIGHT, P. A. (1987). Ammonia distribution and excretion in fish. *Fish Physiol. Biochem.* **3**, 107–120.
- SARDET, C. (1980). Freeze fracture of the gill epithelium of euryhaline teleost fish. *Am. J. Physiol.* **238**, R207–R212.
- SAYER, M. D. J. AND DAVENPORT, J. (1987). The relative importance of the gills to ammonia and urea excretion in five seawater and one freshwater teleost species. *J. Fish Biol.* **31**, 561–570.
- SMART, G. R. (1978). Investigations of the toxic mechanisms of ammonia to fish: Gas exchange in rainbow trout (*Salmo gairdneri*) exposed to acutely lethal concentrations. *J. Fish Biol.* **12**, 93–104.
- SMITH, H. (1929). The excretion of ammonia and urea by the gills of fish. *J. biol. Chem.* **81**, 727–742.
- SOVIO, A., WESTMAN, K. AND NYHOLM, K. (1972). Improved method of dorsal aorta catheterization: haematological effects followed for three weeks in rainbow trout (*Salmo gairdneri*). *Finnish Fish. Res.* **1**, 11–21.
- TANG, Y., MCDONALD, D. G. AND BOUTILIER, R. G. (1989). Acid-base regulation following exhaustive exercise: a comparison between freshwater- and seawater-adapted rainbow trout (*Salmo gairdneri*). *J. exp. Biol.* **141**, 407–418.
- THURSTON, R. V. AND RUSSO, R. C. (1983). Acute toxicity of ammonia in rainbow trout. *Trans. Am. Fish. Soc.* **112**, 696–704.
- THURSTON, R. V., RUSSO, R. C. AND EMERSON, K. (1979). Aqueous ammonia equilibrium – tabulation of percent un-ionized ammonia. *Environmental Protection Agency Ecological Research Series EPA-600/3-79-091*.
- THURSTON, R. V., RUSSO, R. C., LUEDTKE, R. J., SMITH, C. E., MEYN, E. L., CHAKOUMAKOS, C., WANG, K. C. AND BROWN, C. J. D. (1984). Chronic toxicity of ammonia to rainbow trout. *Trans. Am. Fish. Soc.* **113**, 56–73.
- WHITFIELD, M. (1974). The hydrolysis of ammonium ions in seawater: A theoretical study. *J. mar. biol. Ass. U.K.* **54**, 565–580.
- WOOD, C. M., MCDONALD, D. G. AND MCMAHON, B. R. (1982). The influence of experimental

anaemia on blood acid–base regulation *in vivo* and *in vitro* in the starry flounder (*Platichthys flesus*) and the rainbow trout (*Salmo gairdneri*). *J. exp. Biol.* **96**, 221–237.

WRIGHT, P. A. AND WOOD, C. M. (1985). An analysis of branchial ammonia excretion in the freshwater rainbow trout: effects of environmental pH change and sodium uptake blockade. *J. exp. Biol.* **114**, 329–353.
